# Supplementary material for: Morphometric and morphologic analysis of the foramen spinosum in the Slovenian population with clinical correlations
Source: PeerJ. 2023 Dec 19;11:e16559. doi: 10.7717/peerj.16559 (PMC10740660; doi:10.7717/peerj.16559)
Supplement: Supplemental Information 1 — Morphometric measurements of foramen spinosum. All measurements are in mm. Foramen spinosum position relative to spine. A – anterior. P – posterior. M – medial. L – lateral. Aberrant anatomical configurations of the foramen spinosum. [file peerj-11-16559-s001.xlsx]

## Sheet: Measurements
Skull	Right FS	Left FS	Right FS	Left FS	FS-CC	FS-CC	FS-ZTS	FS-ZTS	FS-AZR	FS-AZR	FS-FO	FS-FO	FS shape	FS shape	OBSTRUCTION	MARGINS	GROWTH	FS-spine position	FS-spine position
number	length	length	width	width	right	left	right	left	right	left	right	left	right	left				right	left
1	2.5	2.49	2.13	1.52	7.46	7.53	36.75	37.12	21.02	20.41	2.1	2.43	oval	oval				L	A
2	1.62	1.78	1.49	1.5	8.48	6.6	40.32	37.62	23.05	22.44	5.41	3.33	round	round				AM	AM
3	3.32		1.81		10.73		34.12		21.89		4.13		oval		PSB L			AL
4	2.41	2.68	2.02	2.24	5.58	6.14	37.34	38.72	18.77	18.78	5.94	4.42	round	round	bony plate L			AL	AL
5	2.25	2.08	1.84	2.02	9.38	9.52	33.44	33.58	19.45	18.34	3.6	3.98	round	irregular				PL	PL
6	3.09	3.71	2.64	2.76	6.23	6.92	35.14	35.87	19.89	20.25	3.64	5.49	irregular	irregular				AM	AM
7	3.62	2.65	2.01	1.92	7.67	7.42	40.07	38.74	23.72	22.52	1.7	1.77	round	round		IRR		AM	AM
8	2.29	2.25	2.44	2.58	5.59	7.73	35.17	35.37	19.76	19.42	4.51	3.12	round	irregular		IRR	spine L	A	AM
9		2.11		1.88		8.37		33.25		19.77		3.03		oval					AM
10	2.4	2.55	2.02	2.4	8.94	8.46	34.14	34.65	22.38	20.61	2.6	3.37	oval	round		IRR		AM	A
11	1.77	1.92	1.75	1.08	9.8	8.77	45.11	41.02	26.22	23.05	5.94	3.97	round	round				AM	AM
12	3.64	2.58	3.45	2.02	8.73	8.25	33.85	33.62	22.74	22.64	3.08	3.02	round	oval				AM	AM
13	1.92	1.31	1.28	1.22	6.32	7.1	34.25	35.36	21.54	20.32	1.91	2.8	round	round		IRR	tubercle L	A	AM
14	2.85	2.62	1.79	1.88	8.39	12.04	38.55	39.12	21.33	22	3.88	1.45	round	irregular		IRR		AM	AM
15	2.82	3.25	2.78	2.89	9.63	8.85	36.89	36.99	19.95	19.93	4.12	3.38	round	oval				A	AM
16	2.85	3.53	2.09	2.67	6.63	9.1	38.67	38.07	22.54	21.91	3.38	2.7	round	oval				A	A
17	1.75	2.84	1.65	2.44	6.38	7.74	34.22	37.18	19.35	20.13	5.72	5.18	drop	round				AM	AM
18	4.07	2.59	2.88	2.02	7.28	7.47	33.84	34.01	20.74	20.45	2.81	1.69	irregular	drop	bony spur D			AL	AL
19	2.4	2.72	2.22	2.04	8.48	8.37	37.67	38.42	20.65	19.86	2.42	2.98	round	oval				A	AM
20	2.84	2.1	1.43	1.31	7.81	7.01	30.9	30.85	20.62	21.1	1.92	3.7	oval	oval	bony plate L			AM	AM
21	2.34	2.28	1.72	1.69	9.41	9.14	38.18	38.44	20.67	20.13	2	2.89	round	irregular				AM	AM
22	2.8	3.42	1.91	2.22	8.44	9.65	37.74	37.39	22.45	22.62	2.49	3.37	drop	oval		IRR		AL	AM
23	1.45	2.58	1.26	2.08	9.32	6.78	31.55	33.14	21.88	22.04	2.77	2	round	oval				AL	AL
24	2.63	3.07	1.63	2.45	8.95	9.81	37.64	37.76	21.65	22.15	6.13	3.62	oval	oval	PSB D			AM	AM
25	2.98	2.95	1.61	1.31	7.48	7.26	36.95	37.03	21.84	21.35	2.05	2.16	irregular	irregular				M	M
26	3.47	3.16	2.57	2.22	9.14	9.08	34.04	36.62	20.34	20.56	4.05	4.81	round	round				AL	AL
27	2.92	2.78	2.09	1.96	6.16	5.33	38.92	39.82	22.22	21.24	3.57	3.8	drop	oval				AL	AM
28	2.59	3.64	2.22	1.71	5.26	5.04	32.36	32.73	20.04	20.08	3.95	2.32	oval	oval		IRR		AL	AL
29	1.35	1.82	1.17	1.4	8.15	9.65	32.16	32.59	23.84	23.66	2.03	2.1	oval	oval				A	AL
30	2.88	2.14	2.68	2.09	6.74	7.36	35.73	35.83	23.73	23.77	2.36	3.14	round	round				PL	AL
31	2.92	2.95	2.01	1.86	6.86	9.28	37.65	36.52	21.98	22.02	2.59	2.65	round	round		IRR		AM	AM
32	2.6		2.54		7.47		37.02		22.41		3.4		round					AM
33	2.53	2.18	2.09	1.76	8.36	8.23	34.41	33.84	21.43	21.64	2.05	0.99	irregular	irregular		IRR		AL	AL
34	0.45	2.37	0.42	2.09	7.24	6.88	38.65	37.04	23.45	22.11	3.41	2.99	pinhole	round				AM	AM
35	1.94	2.6	1.53	2.38	9.36	9.08	36.77	36.19	21.23	21.25	0.25	2.67	round	round	bony plate D			AM	PL
36	2.18	2.32	1.28	1.58	8.07	8.08	36.5	35.39	19.32	21.31	2.24	1.77	drop	drop				A	AL
37	1.74	1.43	1.72	1.41	6.34	6.32	32.53	32.55	20.34	20.53	1.04	1.39	round	round				PL	PL
38	2.28	2.37	1.56	2.14	6.95	6.82	33.52	33.51	21.45	21.24	4	3.74	drop	round		IRR		AM	AM
39	2.03	2.23	2.01	2.12	8.82	8.34	38.72	38.22	19.81	21.31	4.13	2.66	round	round				A	A
40	2.82	3.18	1.81	2.95	6.08	6.22	41.73	39.17	24.32	22.14	2.45	4.47	oval	oval				AM	AL
41	3.16	2.92	2.57	2.33	6.71	8.03	33.49	32.9	22.24	21.72	1.1	2.12	round	oval				A	AL
42	2.45	1.47	2.35	2.39	7.24	7.52	35.24	35.14	22.52	23.12	1.73	1.12	round	round				AM	M
43	1.55	1.75	1.45	1.72	10.84	9.66	35.65	34.05	20.11	18.28	0.86	2.74	round	round		IRR		A	AL
44	3.78	3.46	2.58	2.04	9.84	10.04	32.14	37.92	17.86	19.16	1.87	2.82	drop	oval				AM	A
45	1.39	2.62	1.35	2.43	8.42	8.71	31.42	31.51	19.42	19.21	2.83	3.57	round	round				AL	AL
46	2.92	2.3	2.42	2.26	8.23	8.11	32.32	31.98	19.32	18.99	3.76	1.67	oval	irregular			tubercle L	PL	A
47	3.06	1.68	2.98	1.23	7.95	8.23	33.43	33.18	21.34	21.23	2.43	1.11	round	oval				AL	AL
48	2.44	2.82	2.08	2.78	9.24	8.65	39.72	38.24	19.52	21.16	4.96	4.86	round	round				A	AM
49	1.82	2.17	2.08	2.07	7.64	7.16	33.21	33.79	20.85	20.55	3.3	5.09	round	oval	PSB L			A	A
50		1.97		1.52		7.98		36.52		21.02		4.97		irregular				A	AM
51	2.63	2.31	2.42	2.26	8.21	8.22	32.13	32.43	21.43	22.32	1.88	1.73	round	round				AM	AM
52	2.61	3.5	2.55	3.42	9.23	8.98	37.26	37.72	22.87	22.95	1.05	2.17	round	round		IRR		AM	A
53	2.37		2.22		7.02		35.72		20.05		0.85		round					AL
54		2.15		2.63		10.3		31.11		20.22		3.07		oval					AL
55	2.06	2.3	2.02	2	6.85	7.25	37.24	37.01	21.84	21.27	3.08	3.79	round	oval				AM	AM
56	1.98		1.5		6.43		38.02		22.34		7.35		round					AL
57	3.11		2.28		8.23		33.34		20.52		2.61		irregular					L
58	2.22		2.02		8.22		38.3		22.02		3.49		round					AL
59	1.45		1.42		7.43		35.23		19.43		5.14		round					AM
60	1.95		1.38		7.22		37.21		19.55		1.59		round					A
61
62
63	1.99		1.66		8.43		36.23		21.35		2.49		round					AL
64	0.88		0.73		7.98		35.23		22.43		1.1		pinhole					AM
65	2.12	2.64	1.85	1.92	6.24	7.05	35.22	36.78	20.21	20.82	2.52	1.87	oval	drop				A	AM
66	2.55	3.38	1.92	2.31	9.64	12.28	37.05	37.62	21.44	21.62	1.84	2.37	oval	oval				AM	AM
67	2.94	2.02	2.23	1.52	7.32	8.23	35.23	35.64	22.53	22.54	4.57	5.27	irregular	oval		IRR		A	AM
68	3.48	3.22	2.02	2.08	6.89	9.43	36.58	38.24	20.52	20.23	2.72	2.54	round	round				L	L
69	2.49	1.37	2.78	1.8	7.43	7.58	34.23	34.14	20.53	20.64	2.81	4.27	drop	drop				A	AM
70		3.58		2.5		12.35		44.83		20.45		3.02		oval	PSB L				AM
71	2.44	2.4	2.42	2.38	11.29	9.04	34.92	34.12	17.24	17.05	2.04	2.16	drop	round				PM	AM
72		1.83		1.76		9.32		35.23		18.43		1.93		round					M
73	1.87		1.52		7.49		36.53		20.43		2.49		round					AM
74		3.97		2.01		7.86		38.19		20.42		3.13		oval					AM
100	3.04		2.08		8.23		34.53		23.63		2.02		irregular					AM
101	2.51	2.74	2.25	1.71	9.44	9.34	33.95	34.05	21.21	21.06	1.58	2.78	oval	oval				AM	AM
102	2.05	1.71	2.35	2.31	8.57	8.23	34.25	33.64	20.43	20.11	3.39	3.9	irregular	round		IRR		AM	AM
103	2.54	2.75	1.58	2.14	9.88	9.31	37.95	36.45	20.66	18.71	2.47	3.1	drop	round				AM	AM
104	1.05	2.17	1.02	2.05	7.43	7.31	35.63	35.23	19.43	19.55	2.44	2.08	round	round		IRR		PL	PL
105	1.76	2.25	1.53	1.94	6.96	6.52	36.19	35.98	20.02	20.5	2.36	2.55	round	irregular		IRR		AL	AL
106	3.24	3.51	2.3	2.31	7.45	7.58	36.02	36.75	20.74	20.13	3.02	3.02	oval	oval				AM	AL
107	2.88	3.36	1.59	1.77	9.48	7.99	39.41	42.42	21.23	22.29	3.15	5.65	oval	oval				AL	AL
108	2.54	2.44	1.12	1.11	7.74	8.55	38.74	38.22	21.98	22.34	4.4	3.09	drop	oval				AL	AM
109	2.74	3.09	2.72	2.08	8.15	6.14	32.62	35.22	19.82	19.85	3.55	3.6	round	oval				A	A
110	2.2	2.36	1.58	1.65	7.61	7.63	33.53	34.93	18.84	19.22	2.31	1.38	oval	oval				A	AL
111	1.96	2.14	1.85	1.66	8.74	8.82	31.82	32, 54	18.72	18.01	2.54	2.23	round	oval				AM	AM
112	3.62		2.81		5.13		39.44		22.44		2.93		round					AM	AM
113	3.03		2.22		6.94		41.62		22.42		2.61		round					AM
114	2.46	2.93	1.81	2.35	8.32	8.03	34.95	36.32	21.08	20.72	1.7	2.13	oval	oval				AL	A
115	3.6	2.85	1.79	2.42	13.6	14.97	33.12	32.66	20.44	19.58	3.92	3.76	oval	oval		IRR		AL	L
116	2.46	2.34	1.76	2.3	8.59	8.22	35.24	32.04	21.65	21.18	3.99	2.76	round	round				AM	AM
117	2.71	2.61	2.05	1.81	5.46	6.34	38.15	38.74	22.26	21.81	3.37	2.13	oval	oval				AM	AM
118	2.2	1.61	1.52	1.37	11.09	11.05	32.98	31.86	19.81	19.51	1.99	2.91	round	round				A	A
119	2.55	2.54	2.11	1.7	9.25	8.83	36.99	37.14	21.26	22.32	4.06	2.78	round	irregular		IRR		AM	AM
120	1.65	2.05	1.58	2.01	7.82	8.64	37.03	38.66	20.38	20.42	7.72	3.09	round	round				AL	AM
121	2.21	2.68	1.83	1.72	6.92	6.98	36.69	37.21	20.22	19.25	3.81	3.54	oval	drop				AL	AL
122	3.34	3.66	2.52	2.56	8.35	6.81	29.61	29.58	19.86	19.52	2.99	2.34	oval	oval				L	AM
123	2.44	2.35	1.64	1.88	5.35	6.86	38.85	39.32	21.96	22.42	4.61	2.49	oval	oval				P	P
124	2.74	2.85	2.68	2.78	8.24	7.22	38.22	37.64	21.05	21.16	3.84	3.72	round	round	bony plate L			L	L
125	2.18	1.72	1.92	1.78	10.14	10.22	35.92	35.82	22.04	21.92	2.52	2.08	oval	round				L	L
126	2.03	1.54	1.96	1.45	8.95	9.12	35.23	36.21	22.45	22.76	1.92	2.03	round	round				A	AL
127	4.17	3.6	2.41	1.83	6.82	8.95	38.1	37.94	19.71	19.52	3.3	3.18	oval	oval				AL	AL
128	2.44	2.77	1.92	1.84	7.09	7.4	31.99	34.63	21.13	20.54	2.26	1.69	oval	oval				AL	AM
129	2.89	2.68	1.99	2	11.44	12.81	33.42	31.49	22.03	20.13	3.58	2.64	oval	oval		IRR		AM	AM
130	2.62	2.64	2.56	2.54	9.23	8.13	35.21	34.23	21.45	22.53	2.26	2.31	round	round				AM	AM
131	1.29	1.33	1.22	1.28	7.24	7.34	33.24	32.42	20.43	20.88	1.81	3.11	round	round				AM	AL
132	2.15		2.08		8.23		32.64		22.56		2.88		round					AM
133	1.32		1.28		7.54		31.45		20.45		1.72		round					AL
134	1.93	2.22	1.82	2.2	9.42	9.35	32.56	33.12	21.34	21.25	1.72	1.88	round	round				AM	AM
135	1.8	1.97	1.78	1.92	7.34	7.11	30.34	31.43	19.43	20.11	2.38	2.79	round	round				A	AM
136	2.56	2.42	2.53	2.39	8.34	8.65	32.64	31.56	21.53	20.53	3.54	3.23	round	round				AM	AL
ISM 1		0.82		0.77		5.26		32.28		19.68		5.38		round					AM
ISM 2	1.01	1.33	0.98	1.28	7.02	7.32	32.12	32.86	20.35	21.12	2.61	2.17	round	round				L	L
ISM 3	2.15	2.55	2.13	2.06	8.38	8.23	34.02	33.43	21.05	21.74	4.12	5.98	round	oval				M	AM
ISM 4	1.85	2.79	1.76	2.56	8.02	8.54	36.04	36.65	21.11	21.64	3.7	2.19	round	round				A	A
ISM 5	1.76	2.02	1.12	1.97	8.63	8.84	36.84	36.24	22.02	22.53	1.43	2.48	oval	round				AM	AM
ISM 6		1.73		1.67		8.22		33.62		20.62		3.47		round		IRR			A
ISM 7	2.11	2.31	2.09	2.27	7.34	7.88	35.63	36.14	21.53	21.28	4.55	3.34	round	round				AL	AM
ISM 8	2.67	3.23	2.54	3.12	8.26	7.84	33.75	32.98	20.87	20.81	1.76	1.82	round	round				AM	AM
ISM 9	2.18	1.83	2.12	1.78	8.74	8.26	35.74	35.99	21.64	22.02	2.89	4.35	round	round				Tip of spine	Tip of spine
ISM 10	2.34	2.05	2.21	1.99	8.34	7.93	36.67	36.11	19.93	20.36	3.41	2.27	round	round				AM	AM
ISM 11	2.35	3.28	2.11	3.02	7.54	7.85	34.62	33.99	20.05	20.36	2.98	3.88	round	round				Tip of spine	Tip of spine
ISM 12	2.22	2.11	2.14	2.08	7.24	7.13	32.24	33.12	21.53	21.32	1.62	2.36	round	irregular	PSB L		spine L	Tip of spine	AM
ISM 13	3.79	2.78	3.56	2.74	9.24	8.12	33.13	31.54	22.53	21.54	4.51	3.96	round	round	bony plate L			AM	Tip of spine
ISM 14	2.42	2.85	2.34	2.73	8.23	8.01	31.83	31.43	20.12	19.98	2.41	2.44	round	round	bony plate L			AL	L
ISM 15	2.41	1.56	2.34	1.46	7.12	6.99	32.82	31.84	20.12	21.45	4.77	3.38	round	round				AM	AM
ISM 16	2.33	2.99	2.23	2.89	9.23	9.53	35.23	35.75	22.13	22.64	3.82	0.72	round	round	PSB L			L	L
ISM 17	2.98	2.38	2.24	1.98	8.43	7.24	32.57	32.11	21.54	20.43	3.21	2.51	oval	oval				AM	AM
ISM 18	2.52	2.07	2.43	2.02	6.35	6.77	31.45	30.13	20.54	20.12	2.53	2.36	round	round				AM	AM
ISM 19	2.88	2.09	2.67	2.04	7.24	9.13	31.34	32.54	22.54	23.14	1.44	1.01	round	round				AM	AM
ISM 20	3.02	3.67	2.24	2.64	8.95	9.81	37.64	37.64	21.65	22.85	1.86	2.44	oval	oval				AM	A
ISM 21	2.39	2.47	2.37	2.42	7.67	7.42	38.07	35.74	21.72	21.52	2.89	3.46	round	oval		IRR		AM	AM
ISM 22	2.07	2.52	2.03	2.49	7.24	8.23	36.23	37.11	20.45	19.43	2.67	4.55	round	round				AM	AM
ISM 23	2.28	2.98	2.22	2.86	8.48	8.36	37.67	38.42	20.45	19.95	1.88	2.55	round	round				Tip of spine	AM
ISM 24																		AM	AM
ISM 25	2.62	3.06	2.61	3.01	8.12	7.98	33.38	34.93	18.84	19.27	2.83	3.47	round	drop				AM	AM
ISM 26	2.73	2.08	2.68	2.06	5.58	6.14	35.34	36.72	18.77	18.34	1.24	1.71	round	round				AM	AM
ISM 27	3.55	2.43	3.45	2.38	8.23	8.01	32.64	33.21	19.43	20.11	4.42	3.88	round	round	bony plate L			Tip of spine	A
ISM 28	2.28	2.39	2.18	2.32	8.97	8.23	33.65	33.11	20.65	19.93	2.92	4.49	round	round				Tip of spine	Tip of spine
ISM 29	2.41	2.52	2.38	2.49	7.23	7.43	31.35	32.55	21.44	20.84	5.46	5.25	round	round				AM	AM
ISM 30	3.22	2.28	3.15	2.16	8.23	8.11	34.35	34.06	20.21	19.66	2.74	4.01	round	round				AM	AM

## Sheet: Storage information
Skull	Full	Skull	Accession	Specimen
number	skull	half	number	location
1	X		IA-001	Basement IA Bone Room
2	X		IA-002	Basement IA Bone Room
3	X		IA-003	Basement IA Bone Room
4	X		IA-004	Basement IA Bone Room
5	X		IA-005	Basement IA Bone Room
6	X		IA-006	Basement IA Bone Room
7	X		IA-007	Basement IA Bone Room
8	X		IA-008	Basement IA Bone Room
9	X		IA-009	Basement IA Bone Room
10	X		IA-010	Basement IA Bone Room
11	X		IA-011	Basement IA Bone Room
12	X		IA-012	Basement IA Bone Room
13	X		IA-013	Basement IA Bone Room
14	X		IA-014	Basement IA Bone Room
15	X		IA-015	Basement IA Bone Room
16	X		IA-016	Basement IA Bone Room
17	X		IA-017	Basement IA Bone Room
18	X		IA-018	Basement IA Bone Room
19	X		IA-019	Basement IA Bone Room
20	X		IA-020	Basement IA Bone Room
21	X		IA-021	Basement IA Bone Room
22	X		IA-022	Basement IA Bone Room
23	X		IA-023	Basement IA Bone Room
24	X		IA-024	Basement IA Bone Room
25	X		IA-025	Basement IA Bone Room
26	X		IA-026	Basement IA Bone Room
27	X		IA-027	Basement IA Bone Room
28	X		IA-028	Basement IA Bone Room
29	X		IA-029	Basement IA Bone Room
30	X		IA-030	Basement IA Bone Room
31	X		IA-031	Basement IA Bone Room
32	X		IA-032	Basement IA Bone Room
33	X		IA-033	Basement IA Bone Room
34	X		IA-034	Basement IA Bone Room
35	X		IA-035	Basement IA Bone Room
36	X		IA-036	Basement IA Bone Room
37	X		IA-037	Basement IA Bone Room
38	X		IA-038	Basement IA Bone Room
39	X		IA-039	Basement IA Bone Room
40	X		IA-040	Basement IA Bone Room
41	X		IA-041	Basement IA Bone Room
42	X		IA-042	Basement IA Bone Room
43	X		IA-043	Basement IA Bone Room
44	X		IA-044	Basement IA Bone Room
45	X		IA-045	Basement IA Bone Room
46	X		IA-046	Basement IA Bone Room
47	X		IA-047	Basement IA Bone Room
48	X		IA-048	Basement IA Bone Room
49	X		IA-049	Basement IA Bone Room
50	X		IA-050	Basement IA Bone Room
51	X		IA-051	Basement IA Bone Room
52	X		IA-052	Basement IA Bone Room
53		right	IA-053	Basement IA Bone Room
54		left	IA-054	Basement IA Bone Room
55	X		IA-055	Basement IA Bone Room
56		right	IA-056	Basement IA Bone Room
57		right	IA-057	Basement IA Bone Room
58		right	IA-058	Basement IA Bone Room
59		right	IA-059	Basement IA Bone Room
60		right	IA-060	Basement IA Bone Room
61		right	IA-061	Basement IA Bone Room
62		right	IA-062	Basement IA Bone Room
63		right	IA-063	Basement IA Bone Room
64		right	IA-064	Basement IA Bone Room
65	X		IA-065	Basement IA Bone Room
66	X		IA-066	Basement IA Bone Room
67	X		IA-067	Basement IA Bone Room
68	X		IA-068	Basement IA Bone Room
69	X		IA-069	Basement IA Bone Room
70	X		IA-070	Basement IA Bone Room
71	X		IA-071	Basement IA Bone Room
72		left	IA-072	Basement IA Bone Room
73		right	IA-073	Basement IA Bone Room
74		left	IA-074	Basement IA Bone Room
100		right	IA-075	Basement IA Bone Room
101	X		IA-076	Basement IA Bone Room
102	X		IA-077	Basement IA Bone Room
103	X		IA-078	Basement IA Bone Room
104	X		IA-079	Basement IA Bone Room
105	X		IA-080	Basement IA Bone Room
106	X		IA-081	Basement IA Bone Room
107	X		IA-082	Basement IA Bone Room
108	X		IA-083	Basement IA Bone Room
109	X		IA-084	Basement IA Bone Room
110	X		IA-085	Basement IA Bone Room
111	X		IA-086	Basement IA Bone Room
112	X		IA-087	Basement IA Bone Room
113	X		IA-088	Basement IA Bone Room
114	X		IA-089	Basement IA Bone Room
115	X		IA-090	Basement IA Bone Room
116	X		IA-091	Basement IA Bone Room
117	X		IA-092	Basement IA Bone Room
118	X		IA-093	Basement IA Bone Room
119	X		IA-094	Basement IA Bone Room
120	X		IA-095	Basement IA Bone Room
121	X		IA-096	Basement IA Bone Room
122	X		IA-097	Basement IA Bone Room
123	X		IA-098	Basement IA Bone Room
124	X		IA-099	Basement IA Bone Room
125	X		IA-100	Basement IA Bone Room
126	X		IA-101	Basement IA Bone Room
127	X		IA-102	Basement IA Bone Room
128	X		IA-103	Basement IA Bone Room
129	X		IA-104	Basement IA Bone Room
130	X		IA-105	Basement IA Bone Room
131	X		IA-106	Basement IA Bone Room
132	X		IA-107	Basement IA Bone Room
133	X		IA-108	Basement IA Bone Room
134	X		IA-109	Basement IA Bone Room
135	X		IA-110	Basement IA Bone Room
136	X		IA-111	Basement IA Bone Room
ISM 1	X		ISM-001	Basement IA Bone Room
ISM 2	X		ISM-002	Basement IA Bone Room
ISM 3	X		ISM-003	Basement IA Bone Room
ISM 4	X		ISM-004	Basement IA Bone Room
ISM 5	X		ISM-005	Basement IA Bone Room
ISM 6	X		ISM-006	Basement IA Bone Room
ISM 7	X		ISM-007	Basement IA Bone Room
ISM 8	X		ISM-008	Basement IA Bone Room
ISM 9	X		ISM-009	Basement IA Bone Room
ISM 10	X		ISM-010	Basement IA Bone Room
ISM 11	X		ISM-011	Basement IA Bone Room
ISM 12	X		ISM-012	Basement IA Bone Room
ISM 13	X		ISM-013	Basement IA Bone Room
ISM 14	X		ISM-014	Basement IA Bone Room
ISM 15	X		ISM-015	Basement IA Bone Room
ISM 16	X		ISM-016	Basement IA Bone Room
ISM 17	X		ISM-017	Basement IA Bone Room
ISM 18	X		ISM-018	Basement IA Bone Room
ISM 19	X		ISM-019	Basement IA Bone Room
ISM 20	X		ISM-020	Basement IA Bone Room
ISM 21	X		ISM-021	Basement IA Bone Room
ISM 22	X		ISM-022	Basement IA Bone Room
ISM 23	X		ISM-023	Basement IA Bone Room
ISM 24	X		ISM-024	Basement IA Bone Room
ISM 25	X		ISM-025	Basement IA Bone Room
ISM 26	X		ISM-026	Basement IA Bone Room
ISM 27	X		ISM-027	Basement IA Bone Room
ISM 28	X		ISM-028	Basement IA Bone Room
ISM 29	X		ISM-029	Basement IA Bone Room
ISM 30	X		ISM-030	Basement IA Bone Room
